# Supplementary material for: User-reported quality of care: findings from the first round of the People's Voice Survey in 14 countries
Source: PubMed Central journal article supplement (PMC10716624; doi:10.1016/s2214-109x(23)00495-3), 2023-12-11
Supplement: mmc2.pdf [file mmc2.pdf]

# THE LANCET

## Global Health

### Supplementary appendix 2

This appendix formed part of the original submission and has been peer reviewed.  
We post it as supplied by the authors.

Supplement to: Lewis TP, Kassa M, Kapoor NR, et al. User-reported quality of care: findings from the first round of the People's Voice Survey in 14 countries. *Lancet Glob Health* 2023; published online Dec 11. [https://doi.org/10.1016/S2214-109X\(23\)00495-3](https://doi.org/10.1016/S2214-109X(23)00495-3).

## Supplement A: Additional methods and data

**Supplement A table 1: People’s Voice Survey questions on care competence, user experience and system competence**

| Variable                                                           | Survey question                                                                                                                                                                                                                                                                                                                                                         | Response options                       |
|--------------------------------------------------------------------|-------------------------------------------------------------------------------------------------------------------------------------------------------------------------------------------------------------------------------------------------------------------------------------------------------------------------------------------------------------------------|----------------------------------------|
| <b>Ratings of the last health care visit in the past 12 months</b> |                                                                                                                                                                                                                                                                                                                                                                         |                                        |
|                                                                    | <p>The following questions are about your experiences in your last healthcare visit for a new or ongoing health problem or a regular checkup. Please include only your last in-person visit to a trained healthcare provider. This excludes pharmacy or shops or traditional providers.</p> <p>Thinking about this last visit, how would you rate the following...?</p> |                                        |
| Overall quality of last visit                                      | the overall quality of care you received                                                                                                                                                                                                                                                                                                                                | Excellent, Very good, Good, Fair, Poor |
| Provider skills                                                    | the knowledge and skills of your provider                                                                                                                                                                                                                                                                                                                               | Excellent, Very good, Good, Fair, Poor |
| Equipment and supplies                                             | the equipment and supplies that the provider had available, such as medical equipment or access to lab tests                                                                                                                                                                                                                                                            | Excellent, Very good, Good, Fair, Poor |
| Respect from provider                                              | the level of respect your provider showed you                                                                                                                                                                                                                                                                                                                           | Excellent, Very good, Good, Fair, Poor |
| Clarity of explanations                                            | Whether your provider explained things in a way you could understand                                                                                                                                                                                                                                                                                                    | Excellent, Very good, Good, Fair, Poor |
| Involvement in decisions                                           | whether your provider involved you as much as you wanted to be in decisions about your care                                                                                                                                                                                                                                                                             | Excellent, Very good, Good, Fair, Poor |
| Visit duration                                                     | the amount of time your provider spent with you                                                                                                                                                                                                                                                                                                                         | Excellent, Very good, Good, Fair, Poor |
| Visit wait time                                                    | the amount of time you waited before being seen                                                                                                                                                                                                                                                                                                                         | Excellent, Very good, Good, Fair, Poor |
| Courtesy of facility staff                                         | the courtesy and helpfulness of the healthcare facility staff, other than your provider                                                                                                                                                                                                                                                                                 | Excellent, Very good, Good, Fair, Poor |
| Appointment wait time                                              | how long it took for you to get this appointment                                                                                                                                                                                                                                                                                                                        | Excellent, Very good, Good, Fair, Poor |

|                                                                            |                                                                                                                                                                                                                                        |         |
|----------------------------------------------------------------------------|----------------------------------------------------------------------------------------------------------------------------------------------------------------------------------------------------------------------------------------|---------|
| Facility recommendation                                                    | Using a scale from 0 to 10, where 0 means you definitely would not recommend and 10 means you definitely would recommend, how likely is it that you would recommend this healthcare provider or facility to a friend or family member? | 0 to 10 |
| <b>Experience of system competence in all care over the past 12 months</b> |                                                                                                                                                                                                                                        |         |
|                                                                            | Thinking about the last 12 months, could you tell me if the following events have happened to you personally?                                                                                                                          |         |
| No mistake made                                                            | You thought a medical mistake was made in your treatment or care.                                                                                                                                                                      | Yes, No |
| No discrimination                                                          | You were treated unfairly or discriminated against by a doctor, nurse, or another healthcare provider.                                                                                                                                 | Yes, No |
| No unmet need for care                                                     | In the last 12 months, was there a time when you had a health problem and needed medical attention, but you did not get healthcare from a provider?                                                                                    | Yes, No |

## Supplement A figure 1: High-quality processes of care: Indicators from the People's Voice Survey

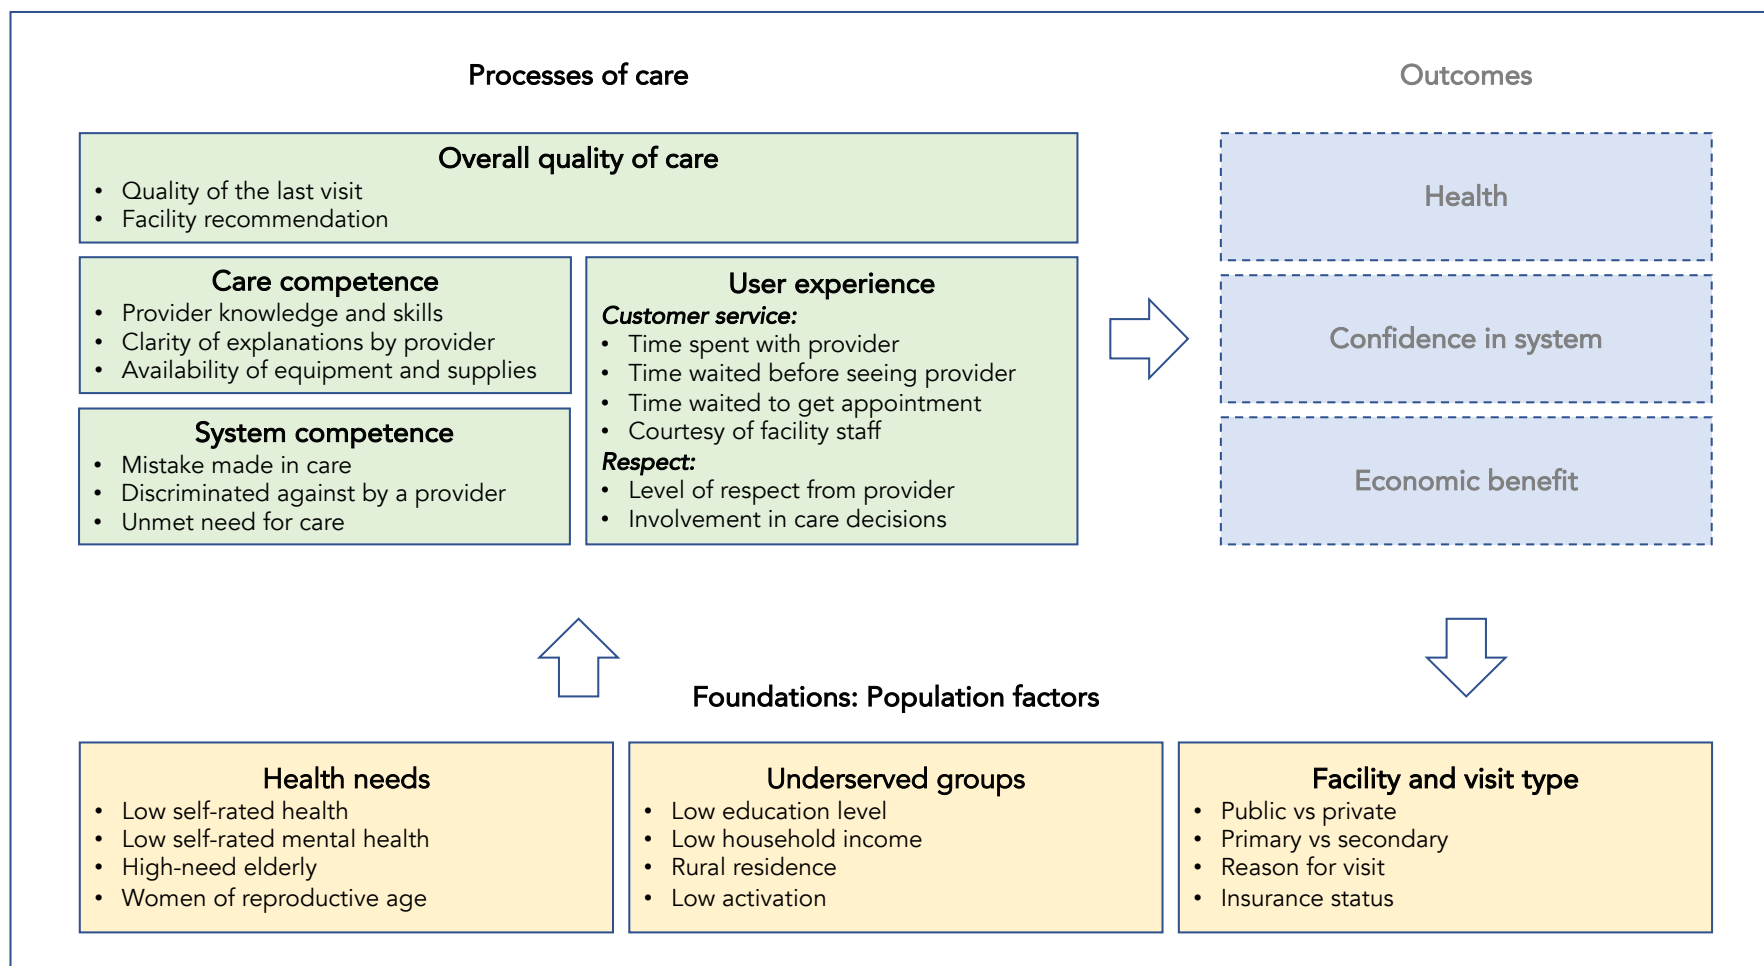

**Supplement A table 2: Facility ownership type and level by country**

|                                                                |                  | AR                                                                                                                   | CO                                                                                                                         | ET                                                                                                                                                             | GB                                                                                                                                                                                                           | IN                                                                                                                                                                              | IT                                                                                          | KE                                                                                                                                                                                               |
|----------------------------------------------------------------|------------------|----------------------------------------------------------------------------------------------------------------------|----------------------------------------------------------------------------------------------------------------------------|----------------------------------------------------------------------------------------------------------------------------------------------------------------|--------------------------------------------------------------------------------------------------------------------------------------------------------------------------------------------------------------|---------------------------------------------------------------------------------------------------------------------------------------------------------------------------------|---------------------------------------------------------------------------------------------|--------------------------------------------------------------------------------------------------------------------------------------------------------------------------------------------------|
| <b>Facility ownership for last visit in the last 12 months</b> | <b>Public</b>    | Public, OSEP, Other 'obras sociales' (Example: OSPE, OSDIPP), PAMI                                                   | Public (based on insurance type): SISBEN, subsidized, no insurance                                                         | Public                                                                                                                                                         | NHS facility, HSC facility                                                                                                                                                                                   | Public                                                                                                                                                                          | Public                                                                                      | Public                                                                                                                                                                                           |
|                                                                | <b>Private</b>   | Prepaid or private (Example OSDE, GALENO, OMINT, MEDIFÉ or similar ones)                                             | Private (based on insurance type): private, contributory, contributory prepaid                                             | Private, NGO, Faith-based                                                                                                                                      | Private facility                                                                                                                                                                                             | Private (for-profit), NGO/Faith-based                                                                                                                                           | Private accredited by SSN, Private not accredited by SSN                                    | Private, NGO, Faith-based                                                                                                                                                                        |
| <b>Facility level for last visit in the last 12 months</b>     | <b>Primary</b>   | Health Center / Polyclinic / Doctor's Office, OSEP Cerca / Delegación / Doctor's Office, Other primary care facility | Health center, Other primary care facility, Health center, Other primary care                                              | Health post, Health center, Mobile clinic, Primary Hospital, Lower clinic, Medium clinic, NGO/Faith-based health center/clinic, Higher clinic/specialty clinic | General practitioner's (GPs) office<br>NHS health centre or NHS walk-in centre<br>HSC health centre or HSC walk-in centre<br>Private medical centre or medical group<br>Urgent care centre<br>Private clinic | Sub-centre/Health and Wellness Centre, Primary Health Centre, Community Health Centre, Informal Providers (rural medical providers (RMP)), Private clinic, Private nursing home | General practitioner's office, Outpatient clinic                                            | Government dispensary, Government health center or clinic, Community health worker or outreach, Mobile clinic, Private clinic or doctor's office, Private medical center, NGO/faith-based clinic |
|                                                                | <b>Secondary</b> | Hospital, Clinic / Sanatorium / Hospital / OSEP Central, Other secondary care facility or higher                     | Hospital, Clinic, Another secondary care facility, Hospital, Clinic, Another secondary care facility, Other secondary care | General Hospital, Referral /specialized hospital, Hospital /specialty center, NGO/Faith-based hospital                                                         | Same day emergency care (SDEC)<br>Hospital emergency room<br>Hospital outpatient department (doctor's office based in hospital)                                                                              | District Hospital, Medical College, Private hospital, Faith-based hospital (religion or sect-based facility)                                                                    | Hospital outpatient department (doctor's office based in hospital), Hospital emergency room | Government /district /county hospital, Private hospital, NGO/faith-based hospital                                                                                                                |

| LA                                                         | MX                                                                                                                                                                                                                                                                                                                          | PE                                                                                                                                           | ZA                                                                                                                                                                                                                                                   | KR                                                 | GB                                                                                                                                                                                                           | US                                                                                                                                                                                                                                                                                               | UY                                                                                                                                                     |
|------------------------------------------------------------|-----------------------------------------------------------------------------------------------------------------------------------------------------------------------------------------------------------------------------------------------------------------------------------------------------------------------------|----------------------------------------------------------------------------------------------------------------------------------------------|------------------------------------------------------------------------------------------------------------------------------------------------------------------------------------------------------------------------------------------------------|----------------------------------------------------|--------------------------------------------------------------------------------------------------------------------------------------------------------------------------------------------------------------|--------------------------------------------------------------------------------------------------------------------------------------------------------------------------------------------------------------------------------------------------------------------------------------------------|--------------------------------------------------------------------------------------------------------------------------------------------------------|
| Government hospital, Government health center              | Secretaria de Salud o Servicios Estatales de Salud, IMSS-Bienestar (antes IMSS prospera o IMSS Oportunidades), El IMSS, El ISSSTE/ISSSTE Estatal, PEMEX, Defensa or Marina, Other                                                                                                                                           | Public (based on insurance type): SIS, EsSalud, Sanidad de las Fuerzas Armadas y Policiales                                                  | Public                                                                                                                                                                                                                                               | Public                                             | NHS facility, HSC facility                                                                                                                                                                                   | Free community clinic or health center (e.g., Planned Parenthood or other clinics that are free of charge like Federally Qualified Health Centers), Veteran's Affairs, Military, or Indian Health Service clinic or health center                                                                | Public, mutual                                                                                                                                         |
| Private hospital, Private clinic, NGO/Faith clinic         | Establecimiento privado                                                                                                                                                                                                                                                                                                     | Private                                                                                                                                      | Private, NGO, Faith-based                                                                                                                                                                                                                            | Private (non-profit organization/religion-related) | Private facility                                                                                                                                                                                             | Doctor's office, clinic, or health center, Urgent care clinic, Hospital emergency room, Hospital outpatient department (doctor's office based in hospital)                                                                                                                                       | Private                                                                                                                                                |
| Government health center, Private clinic, NGO/Faith clinic | Puesto de salud, Clinica o unidad de medicina familiar, Clínica o unidad de medicina familiar, clínica o unidad de consulta externa, módulo de medicina familiar o puesto periférico, Brigada móvil de salud, Centros de salud o centro de primer contacto, Brigada móvil de salud o unidad médica móvil, Unidad de salud o | Health post, Health center, Post/health center, Other primary care facility, Post/health center, Private office, other primary care facility | Mobile clinic, Ward-based outreach care, Health posts, Department of health clinic, Municipal clinic, Department of health community center, General practitioners practices, Private clinics, Private health centers, Faith-based or mission clinic | Health center, Clinic                              | General practitioner's (GPs) office<br>NHS health centre or NHS walk-in centre<br>HSC health centre or HSC walk-in centre<br>Private medical centre or medical group<br>Urgent care centre<br>Private clinic | Doctor's office, clinic, or health center, Urgent care clinic, Free community clinic or health center (e.g., Planned Parenthood or other clinics that are free of charge like Federally Qualified Health Centers), Veteran's Affairs, Military, or Indian Health Service clinic or health center | Health center, Other primary care facility, Health center, Other primary care facility, Health center, Other primary care facility, Other primary care |

|                                       |                                                                                                                                                                                                                                                                                                                                                                                                                                                                                                                                                                                     |                                                                                                                                                             |                                                                                                                                                                              |                                                                                                                                                 |                                                                                                                           |                                                                                             |                                                                                                                                  |
|---------------------------------------|-------------------------------------------------------------------------------------------------------------------------------------------------------------------------------------------------------------------------------------------------------------------------------------------------------------------------------------------------------------------------------------------------------------------------------------------------------------------------------------------------------------------------------------------------------------------------------------|-------------------------------------------------------------------------------------------------------------------------------------------------------------|------------------------------------------------------------------------------------------------------------------------------------------------------------------------------|-------------------------------------------------------------------------------------------------------------------------------------------------|---------------------------------------------------------------------------------------------------------------------------|---------------------------------------------------------------------------------------------|----------------------------------------------------------------------------------------------------------------------------------|
|                                       | Unidad de Médica Rural, Clínica o unidad de consulta externa, Consultorio anexo a farmacia, Consultorio médico privado o grupos de consultorios de especialidades de atención ambulatoria                                                                                                                                                                                                                                                                                                                                                                                           |                                                                                                                                                             |                                                                                                                                                                              |                                                                                                                                                 |                                                                                                                           |                                                                                             |                                                                                                                                  |
| Government hospital, Private hospital | Hospital general, Centro Médico Nacional o Hospitales de especialidades como hospital de ginecología y obstetricia, pediatría, oncología, cardiología, oftalmología, etc., Hospital general o regional, Centro médico Nacional o Hospital de especialidades, Hospital civil, municipal, general, o regional, Hospital general, hospital rural o centro de atención rural obstétrica, Institutos Nacionales con hospitales monotemáticos (por ejemplo, Instituto Nacional de salud mental), Hospital de especialidades, Hospital general privado, Hospital de especialidades privado | Hospital, National Institute, Another secondary care facility, Clinic, Higher or specialty clinic, Other secondary care facility, Hospital/specialty centre | District hospital, Department of health hospital (regional, Tertiary and Central hospitals), Specialist private practices, Private hospital, Faith-based or mission hospital | Secondary Hospital (30-100 beds or less, regardless of the number of medical subjects), Tertiary general hospital (mostly university hospitals) | Same day emergency care (SDEC) Hospital emergency room Hospital outpatient department (doctor's office based in hospital) | Hospital emergency room, Hospital outpatient department (doctor's office based in hospital) | Hospital or sanatorium, Other secondary care facility, Clinic or sanatorium, Clinic or sanatorium, Other secondary care facility |

Notes: Argentina includes the Province of Mendoza only. "Appointment wait time" is missing for countries where this question was not included in the survey. Country codes: ET=Ethiopia, KE=Kenya, ZA=South Africa, PE=Peru, CO=Colombia, MX=Mexico, UY=Uruguay, AR=Argentina, LA=Laos, IN=India, KR=South Korea, It=Italy, GB=United Kingdom, US=United States.

**Supplement A table 3: Ratings of overall quality of the last visit in the past 12 months by health need, underserved groups, and facility type**

|                                              | ET    | KE    | ZA    | PE    | CO    | MX    | UY    | AR    | LA    | IN    | KR    | IT    | GB    | US    |
|----------------------------------------------|-------|-------|-------|-------|-------|-------|-------|-------|-------|-------|-------|-------|-------|-------|
| Sample size =                                | 1528  | 1398  | 1444  | 890   | 946   | 639   | 976   | 918   | 1018  | 653   | 1887  | 618   | 1084  | 1296  |
| <b>Health need groups</b>                    |       |       |       |       |       |       |       |       |       |       |       |       |       |       |
| <b>Self-rated health</b>                     |       |       |       |       |       |       |       |       |       |       |       |       |       |       |
| High self-rated health                       | 51.0% | 48.9% | 61.6% | 35.4% | 38.4% | 55.4% | 60.9% | 69.9% | 25.3% | 45.2% | 33.5% | 66.5% | 71.0% | 75.6% |
| Low self-rated health                        | 35.5% | 37.7% | 41.2% | 31.3% | 28.4% | 45.9% | 58.4% | 52.3% | 23.2% | 34.2% | 23.2% | 53.5% | 69.5% | 66.8% |
| <b>Self-rated mental health</b>              |       |       |       |       |       |       |       |       |       |       |       |       |       |       |
| High self-rated mental health                | 46.6% | 48.1% | 57.0% | 32.2% | 37.0% | 53.9% | 63.8% | 66.2% | 24.4% | 44.9% | 32.1% | 65.6% | 74.0% | 78.4% |
| Low self-rated mental health                 | 41.0% | 31.5% | 45.1% | 37.0% | 28.6% | 43.4% | 41.5% | 61.3% | 25.5% | 31.4% | 20.5% | 40.6% | 59.6% | 51.9% |
| <b>High-need older adults</b>                |       |       |       |       |       |       |       |       |       |       |       |       |       |       |
| Under 50 years old and/or no chronic illness | 43.6% | 46.8% | 55.1% | 32.1% | 35.5% | 50.9% | 54.9% | 63.4% | 23.7% | 41.7% | 30.5% | 62.7% | 66.4% | 71.4% |
| 50 years and older with chronic illness      | 65.5% | 43.3% | 51.5% | 40.9% | 36.8% | 55.3% | 74.2% | 71.3% | 30.6% | 20.1% | 25.8% | 61.8% | 79.1% | 82.2% |
| <b>Women of reproductive age</b>             |       |       |       |       |       |       |       |       |       |       |       |       |       |       |
| Women 50 years and older                     | 37.6% | 42.9% | 49.2% | 36.2% | 41.5% | 46.2% | 74.1% | 71.4% | 29.4% | 39.5% | 25.2% | 56.7% | 79.2% | 79.4% |
| Women 18 to 49 years old                     | 43.7% | 45.3% | 52.9% | 29.1% | 37.9% | 45.0% | 49.5% | 57.4% | 20.4% | 38.8% | 30.5% | 66.1% | 59.3% | 61.9% |
| <b>Underserved groups</b>                    |       |       |       |       |       |       |       |       |       |       |       |       |       |       |
| <b>Education</b>                             |       |       |       |       |       |       |       |       |       |       |       |       |       |       |
| Post-secondary                               | 48.7% | 52.1% | 60.6% | 31.4% | 32.3% | 63.6% | 66.9% | 73.6% | 26.4% | 40.3% | 28.0% | 73.3% | 69.3% | 77.7% |
| Secondary school or lower                    | 45.0% | 45.9% | 53.8% | 34.0% | 36.8% | 48.4% | 59.4% | 61.6% | 24.3% | 40.3% | 32.4% | 60.1% | 74.7% | 68.3% |
| <b>Household income</b>                      |       |       |       |       |       |       |       |       |       |       |       |       |       |       |
| Middle and highest income                    | 51.3% | 57.5% | 57.8% | 35.2% | 35.8% | 53.9% | 62.0% | 72.1% | 23.2% | 43.7% | 28.9% | 65.5% | 70.1% | 78.4% |
| Lowest income                                | 36.5% | 42.1% | 49.2% | 31.8% | 35.7% | 49.7% | 58.2% | 56.7% | 28.6% | 37.4% | 30.2% | 58.5% | 71.7% | 65.2% |



|                           |       |       |       |       |       |       |       |       |       |       |       |       |       |       |
|---------------------------|-------|-------|-------|-------|-------|-------|-------|-------|-------|-------|-------|-------|-------|-------|
| <b>Urban vs rural</b>     |       |       |       |       |       |       |       |       |       |       |       |       |       |       |
| Urban                     | 48.7% | 56.1% | 53.4% | 30.8% | 35.8% | 54.4% | 59.7% | 66.4% | 29.0% | 49.8% | 29.1% | 63.3% | 69.9% | 73.4% |
| Rural                     | 43.7% | 42.4% | 57.0% | 47.6% | 35.6% | 39.7% | 68.7% | 52.7% | 22.8% | 30.8% | 30.3% | 41.7% | 77.3% | 79.6% |
| <b>Activation</b>         |       |       |       |       |       |       |       |       |       |       |       |       |       |       |
| High activation           | 51.3% | 47.4% | 59.9% | 36.3% | 41.2% | 64.4% | 69.0% | 74.2% | 27.4% | 46.8% | 52.4% | 72.6% | 78.6% | 85.3% |
| Low activation            | 38.7% | 45.6% | 47.4% | 32.2% | 31.0% | 41.5% | 48.6% | 54.5% | 21.3% | 37.0% | 27.0% | 59.8% | 65.7% | 62.5% |
| <b>Facility type</b>      |       |       |       |       |       |       |       |       |       |       |       |       |       |       |
| <b>Facility ownership</b> |       |       |       |       |       |       |       |       |       |       |       |       |       |       |
| Public                    | 42.6% | 40.9% | 49.3% | 27.2% | 36.3% | 44.7% | 59.3% | 58.1% | 21.8% | 41.4% | 32.1% | 57.9% | 69.3% | 69.5% |
| Private                   | 55.9% | 60.0% | 70.5% | 47.4% | 35.1% | 68.4% | 67.5% | 78.1% | 35.2% | 39.7% | 28.2% | 69.6% | 92.6% | 74.5% |
| <b>Facility level</b>     |       |       |       |       |       |       |       |       |       |       |       |       |       |       |
| Primary                   | 44.7% | 41.3% | 52.7% | 27.6% | 34.5% | 49.8% | 58.5% | 64.9% | 26.4% | 38.2% | 30.0% | 69.0% | 69.4% | 74.2% |
| Secondary                 | 51.2% | 53.7% | 60.3% | 42.4% | 36.7% | 57.0% | 61.3% | 66.3% | 23.6% | 42.4% | 28.6% | 57.0% | 76.1% | 74.4% |

Notes: Argentina includes the Province of Mendoza only. Activation is defined as the respondent being very confident (versus somewhat, not too, or not at all confident) they can bring up concerns to their provider without being asked and they are responsible for managing their overall health. Public ownership includes social health insurance and social security systems in relevant countries. Private versus public facilities in Colombia are defined by whether the respondent had public or private insurance coverage. Country codes: ET=Ethiopia, KE=Kenya, ZA=South Africa, PE=Peru, CO=Colombia, MX=Mexico, UY=Uruguay, AR=Argentina, LA=Laos, IN=India, KR=South Korea, It=Italy, GB=United Kingdom, US=United States.
